# Supplementary material
Source: PubMed Central journal article supplement (PMC3193267)

**Figure S1. Sequencing traces for ATLL FERM domain mutations L156P.** A)

Direct Sanger sequencing of a PCR product from one of our patients showed a low peak for G under a higher peak for A. The trace shows the complement of the codon so that the variant is a T to C substitution. Thus, the codon for Lys (CTC) was mutated to Pro (CCC). B) Direct PCR sequence trace for control genomic DNA which is pooled from over 50 donors of the local Nashville Red Cross. No significant background is present. C) We found the L156P variant in 10% of clones of PCR products in pGEM-T vector. A sequence representative of the positive clones is shown.

**Figure S2. Frequency of Tax approximates the frequency of mutations in**

**one ATLL patient.** One patient was identified as having a JAK3 L156P mutation at a frequency of approximately 10% as estimated by number of subclones containing the mutations. Genomic DNA for this patient was quantified for tax copies (blue diamonds) using quantitative PCR (qPCR). Tax levels are roughly 8.7% of the control Chromosome 11 short tandem sequence (STS) (red squares) levels. Tax frequency was calculated as the difference between mean Ct for tax (1 copy) and the mean Ct for STS (2 copies), which was 1:32. Tax quantification approximates the frequency of leukemic cells in the buffy coat sample. We conclude that the leukemic cell frequency is approximately the same as the frequency of L156P mutation.

**Figure S3. Mutant JAK3s show binding to  $\gamma_c$  comparable with that of WT**

**JAK3.** JAK3 (106 kDa) and  $\gamma_c$  (48 kDa) co-immunoprecipitation (IP) and Western blot (WB) analysis are shown. BaF3 cells were transduced with WT JAK3 or mutant JAK3s and then subjected to IP. Blots were performed with infrared dye labeled secondary antibodies and were quantified. The quantification is shown in bar graphs. The proteins precipitated were quantified and normalized to the comparable band seen for WT JAK3. IP data represents two independent experiments.

**Figure S4. Quantification of JAK3 and pSTAT5 for HuT-102 and MT-2 from**

**experiment in Fig. 3.** Protein lysates from the experiments similar to those shown in Figure 4 were blotted quantitatively for JAK3, STAT5, pSTAT5 and tubulin. JAK3 and pSTAT5 protein quantity was normalized to that seen in cells treated with DMSO (vehicle) alone.

**Figure S5. Cell growth with inhibition of PI3K/mTor.** BEZ-235 binds the ATP-binding clefts of PI3K and mTOR inhibiting their activity. MTT experiments were performed at concentrations of 0, 0.01, 0.05, 0.1, 0.5, 1, 5, 10, 50, 100, 500, and 1000nM. Goodness of fit as represented by  $R^2$  values are shown in red and 95% confidence intervals for IC50s are shown in blue. Graphed data is a compilation of two experiments done in quadruplicate error bars represent SEM.

**Figure S6. Cell growth with inhibition of PI3K.** BKM-120 is a pan-PI3K inhibitor PI3K. MTT experiments were performed at concentrations of 0, 0.025, 0.05, 0.1, 0.25, 0.5, 1, 2.5, 5, 10, 50, and 100 $\mu$ M. Goodness of fit as represented by  $R^2$  values are shown in red and 95% confidence intervals for IC50s are shown in blue. Graphed data is a compilation of two experiments done in quadruplicate error bars represent SEM.

**Figure S7. Cell growth with inhibition of ERK1/2.** CI-1040 is a non-competitive inhibitor of MEK1/2 as measured but activation of ERK1/2. MTT experiments were performed at concentrations of 0, 0.01, 0.05, 0.1, 0.5, 1, 5, 10, 50, 100, 500, and 1000nM. Goodness of fit as represented by  $R^2$  values are shown in red and 95% confidence intervals for IC50s are shown in blue. Graphed data is a compilation of two experiments done in quadruplicate error bars represent SEM.

**Table S1. JAK3 FERM domain mutations and SNPs identified in ATLL**

**patients.** A) Three DNA point mutations were identified in JAK3 exon 4 for 4 out of the 36 ATLL patients sampled. B) Of two are nonsynonymous SNPs listed in the NCBI Entrez database only P132T was identified in 1 of our 36 ATLL patient samples. Five Single Nucleotide Polymorphisms (SNPs) are listed for JAK3 FERM domain in NCBI Entrez database. Additionally, multiple SNP variants within introns 2-5 were identified for 3 ATLL patients (data not shown).

**Table S2. Primer list for REVEAL PCR and sequencing of 36 ATLL and 24 ethnic matched control samples**

**Table S3. Primer list for site directed mutagenesis of JAK3 to introduce ATLL mutations**

**Table S4. Growth media and conditions for all cell lines**

**Table S5. Origins of ethnically matched control samples**

Table S1

| Cluster id     | Region of JAK3 | # Patients | dbSNP Allele | Protein Residue  |
|----------------|----------------|------------|--------------|------------------|
| rs3212711      | Intron 1       | 2 +HUT102  | C to T       | NA               |
| rs3212712      | Intron 1       | 2 +HUT102  | G to A       | NA               |
| rs3212713      | Intron 1       | 2 +HUT102  | G to A       | NA               |
| rs3212716      | Exon 3         | 1          | C356G        | Leu99 synonymous |
| rs3212718      | Intron 3       | 1          | A to G       | NA               |
| rs3212719      | Intron 3       | 1          | A to G       | NA               |
| rs3212723      | Exon 4         | 1          | C453A        | Pro132Thr        |
| novel mutation | Exon 4         | 1          | T525C        | Leu156Pro        |
| novel mutation | Exon 4         | 1          | A606G        | Glu183Gly        |
| novel mutation | Exon 4         | 2          | G573A        | Arg172Gln        |

Table S2

|                   | <b>Sense</b>                         | <b>Antisense</b>                         | <b>Product size</b> |
|-------------------|--------------------------------------|------------------------------------------|---------------------|
| <b>Exon2:</b>     | CAGAAGTCCAATCCCCTCTG                 | AGCTTCCAATCTTGGCCC                       | 321                 |
| <b>Exon3:</b>     | GATCTGGACGGTTGGGTATG                 | CAAGTGACCCACCCTCTCTG                     | 356                 |
| <b>Exon4-5:</b>   | CCCCACCATAATGCTCACTCC                | AGCCCACGTTGCTCACTC                       | 592                 |
| <b>Exon6:</b>     | TTTGTGTGTGTCCTCCG                    | TACCACTCTCCGGCCCC                        | 435                 |
| <b>Exon7-8:</b>   | ATAGGGAGTGGATGGTGTGG                 | TGAGGCATAGAGAAGGGGAG                     | 537                 |
| <b>Exon9:</b>     | TACCTGAATTTGAGCCCAGG                 | ATTCAAACGTCACCTCCTCC                     | 248                 |
| <b>Exon10:</b>    | CTGGAATGAGTTCATGGTGC                 | GGCTTTAATGAGCAAGTGCC                     | 976                 |
| <b>Exon11-12:</b> | TTGGGGACTTTTCACCTCTG                 | TTTCTCTGCATCCACGACC                      | 583                 |
| <b>Exon13:</b>    | TTGGGATTATTGGAGTGGAAG                | AGAGGTGGGAAGAACAGCC                      | 211                 |
| <b>Exon14:</b>    | GCAGAACCTCCTCAACACAAG                | AATTCCTCTTCCACCCAGAG                     | 261                 |
| <b>Exon15-16:</b> | GCCAAACAGACTTTCATTCATC               | GACTGGATGTCAGTCTGCCC                     | 496                 |
| <b>Exon17:</b>    | AGATTGGGGTGGGTCTATTG                 | ACCACGCTCCTTCCACTG                       | 275                 |
| <b>Exon18-19:</b> | TCAACTCAGGAGTGGGGC                   | GCAGGAGGGTAAGAATGTGC                     | 547                 |
| <b>Exon20:</b>    | GCAAAACTGAGGTGAGAGG                  | ACCCCAAACCACTCCTCAG                      | 330                 |
| <b>Exon21:</b>    | GTCACGCTTGGGGTACCTG                  | CTGGGGAGCAAAGCAGC                        | 337                 |
| <b>Exon22:</b>    | CCCCTCTTCTGTCTTTTC                   | CAGGCGCAGACAGGTTG                        | 253                 |
| <b>Exon23:</b>    | ATCACAGATGGCCCCTACC                  | TGAAAGTGCTCGACTTGCC                      | 382                 |
| <b>Exon4</b>      | GTAAAACGACGGCCAGTGGGGTCAGCCCAGGATTG  | CAGGAAACAGCTATGACCGCCCTGGGTCATAGGAACAC   | ~400                |
| <b>Exon16</b>     | GTAAAACGACGGCCAGTACCCCACTTTGACAGAAGG | CAGGAAACAGCTATGACCCCAACCTCACCAGACACACAGG | ~400                |

Table S3

|              | <b>Sense</b>                                  | <b>Antisense</b>                                | <b>RE Site Introduced</b> |
|--------------|-----------------------------------------------|-------------------------------------------------|---------------------------|
| <b>L156P</b> | GGGCGCCTCCCCGTGGGCCCCAGTCTCAAGGAGCAGGG        | CCCGCGGAGGGGCACCCGGGGTCAGAGTTCCTCGTCCC          | Apal                      |
| <b>E183G</b> | GCGAGAGCAGGCCAGCGGCCGGGAGGGCTGCTGAAGACTGTCAGC | CGCTCTCGTCCGGGTGCGCCGGCCCTCCCGACGACTTCTGACAGTCG | BglI                      |
| <b>R172Q</b> | TTGGACCTGGCCCAGATGGCGCGAGAG                   | CTCTCGCGCCATCTGGGCCAGGTCCAA                     | Bst51                     |
| <b>P132T</b> | GCTATCCTTGACTTAACAGTCCTGGAGCACC               | GGTGCTCCAGGACTGTTAAGTCAAGGATAGC                 | MseI                      |
| <b>K855A</b> | GGTGGCCGTGGCACAGCTGCAGC                       | GCTGCAGCTGTGCCACGGCCACC                         | BtgI                      |
| <b>Y100C</b> | CCCAAGTCCTGCTGTGCAGGATTCG                     | CGAATCCTGCACAGCAGGACTTGGG                       | BsgI                      |

Table S4

| <b>Cell Culture Media</b> |                                                                     |
|---------------------------|---------------------------------------------------------------------|
| <b>BaF3</b>               | IMDM 10% FBS, 1% Penicillin/Streptomycin, 2% WeHi conditioned media |
| <b>WEHI-3B</b>            | IMDM 10% FBS, 1% Penicillin/Streptomycin                            |
| <b>OP9-DL1</b>            | alphaMEM, 20% FBS, 1% Penicillin/Streptomycin                       |
| <b>OP9-GFP</b>            | alphaMEM, 20% FBS, 1% Penicillin/Streptomycin                       |
| <b>HuT-102</b>            | RPMI, 10% FBS, 1% Penicillin/Streptomycin, 100U/ml hIL-2            |
| <b>MT-2</b>               | RPMI, 10% FBS, 1% Penicillin/Streptomycin                           |
| <b>HEK 293T</b>           | DMEM, 10% FBS, 1% Penicillin/Streptomycin                           |
| <b>Phoenix</b>            | DMEM, 10% FBS, 1% Penicillin/Streptomycin                           |

Table S5

| Specimen ID | Country of Origin |
|-------------|-------------------|
| 1 V280      | Haiti             |
| 2 V289      | Haiti             |
| 3 V290      | Jamaica           |
| 4 V291      | Haiti             |
| 5 V292      | Haiti             |
| 6 V293      | Jamaica           |
| 7 V295      | Jamaica           |
| 8 V281      | Jamaica           |
| 9 V296      | Haiti             |
| 10 V297     | Jamaica           |
| 11 V298     | Haiti             |
| 12 V299     | Haiti             |
| 13 V304     | Haiti             |
| 14 V307     | Haiti             |
| 15 V312     | Jamaica           |
| 16 V314     | Jamaica           |
| 17 V318     | Haiti             |
| 18 V319     | Jamaica           |
| 19 V321     | Jamaica           |
| 20 V322     | Jamaica           |
| 21 V325     | Jamaica           |
| 22 V326     | Jamaica           |
| 23 V327     | Jamaica           |

Figure S1

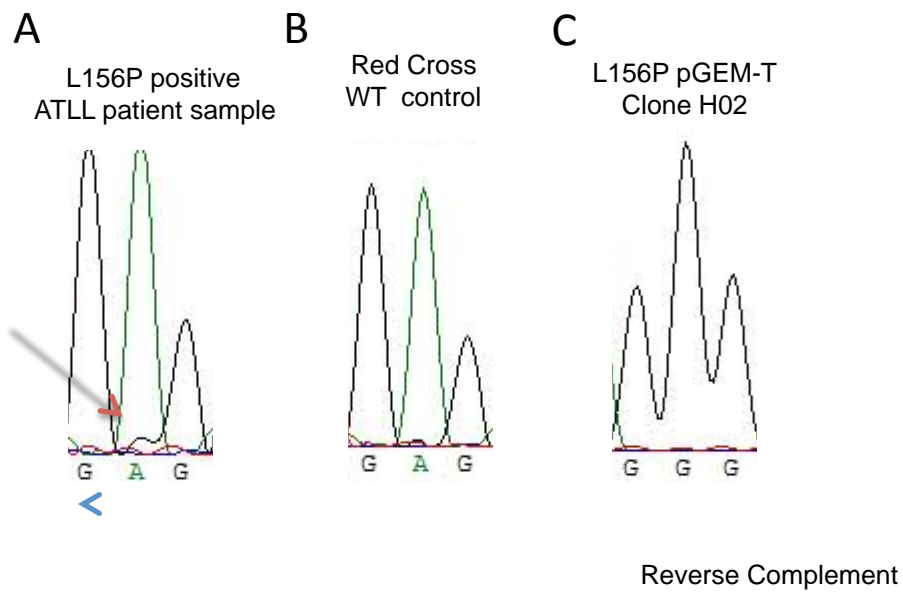



Figure S2

TAX Q-PCR

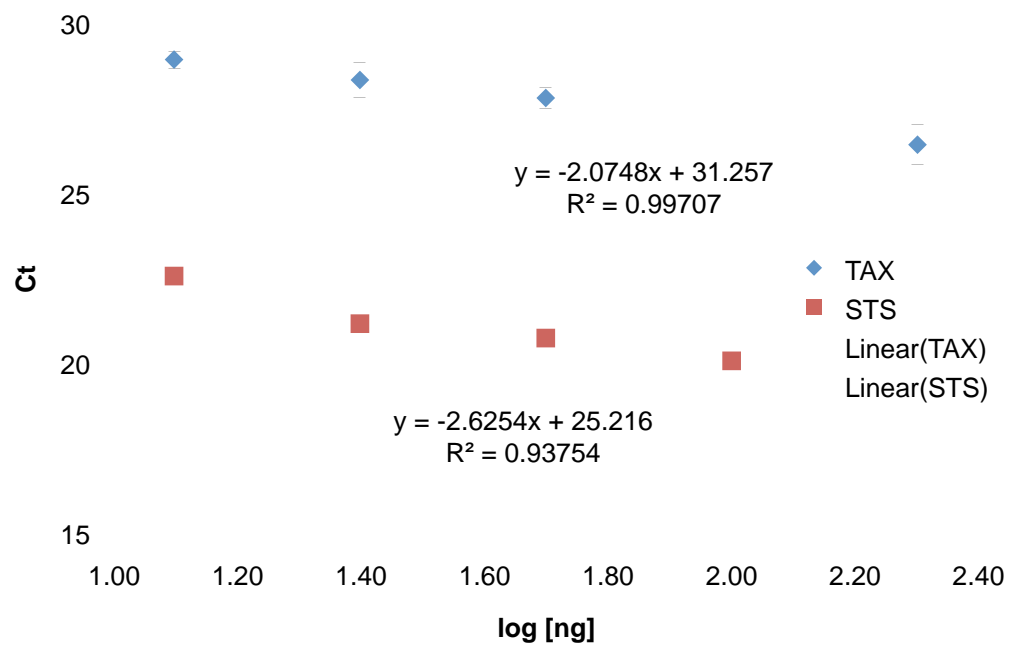

Figure S3

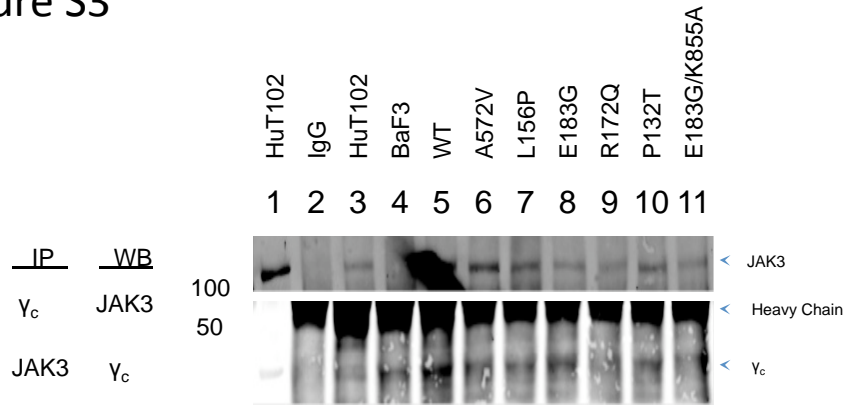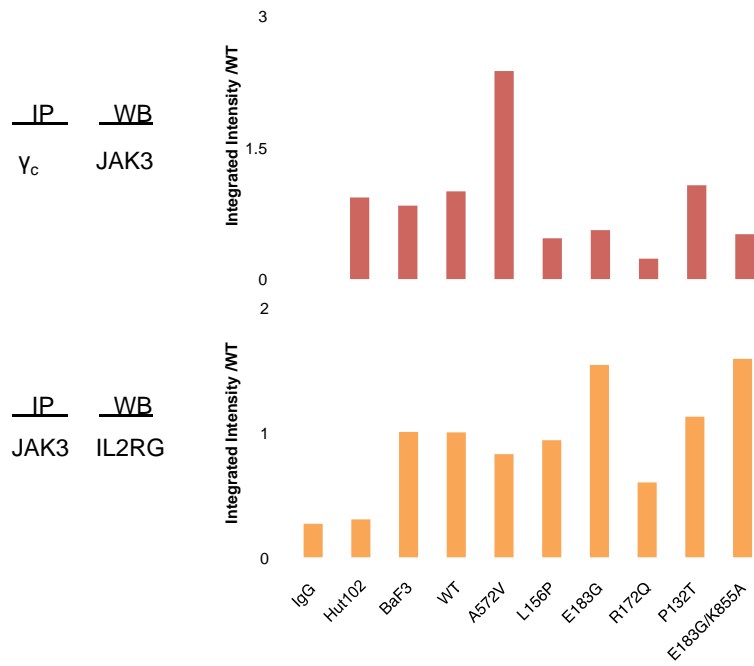

# Figure S4

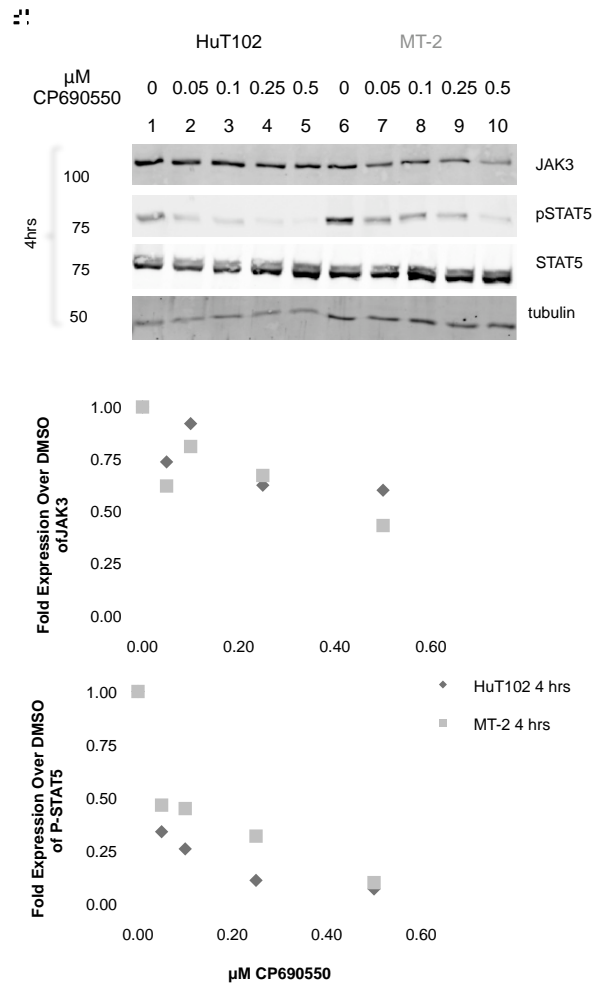

Figure S5

## BEZ-235 (PI3K/mTOR)

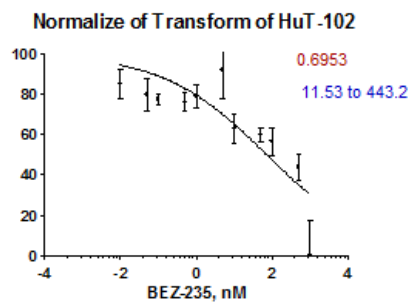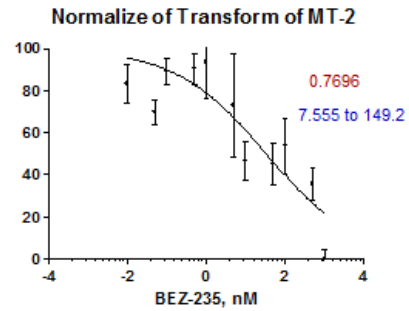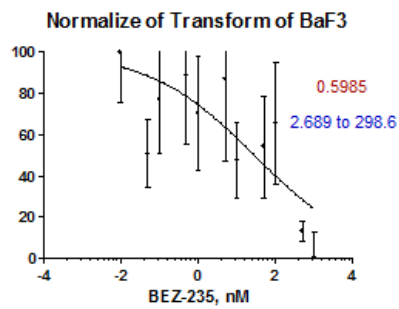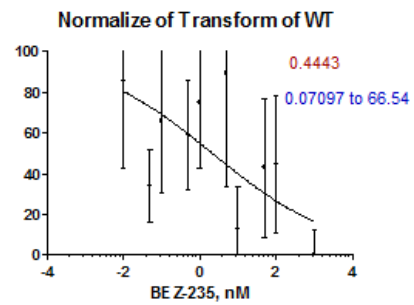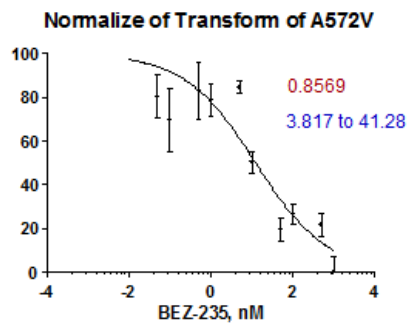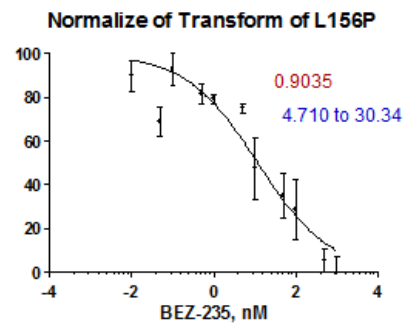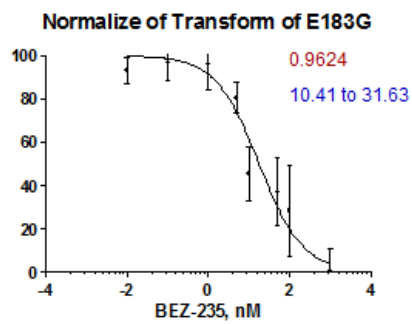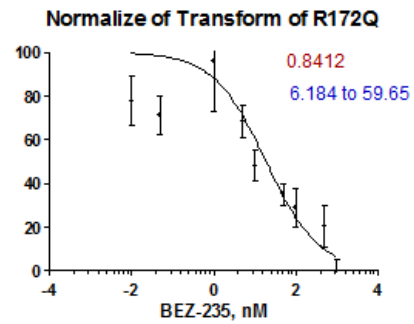

Figure S6

# BKM-120 (PI3K) $\mu$ M

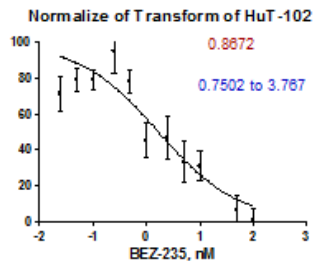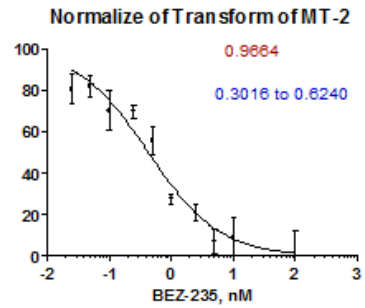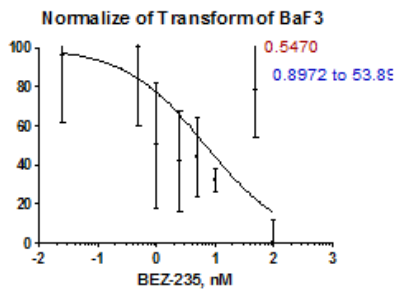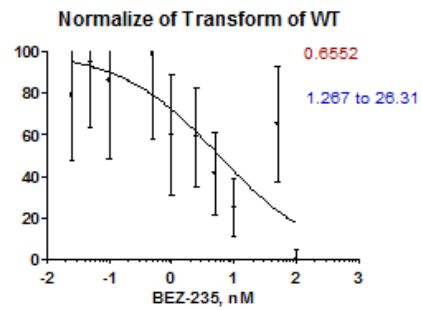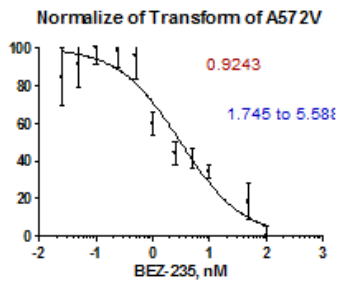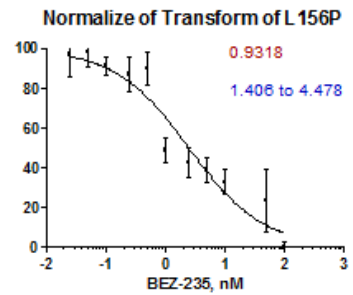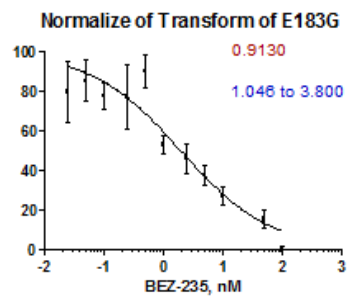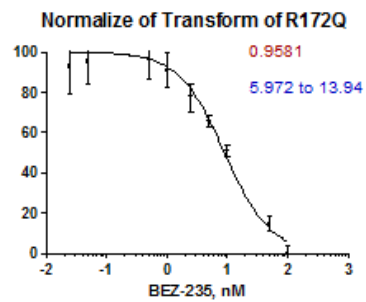

Figure S7

# CI-1040 (ERK1/2) nM

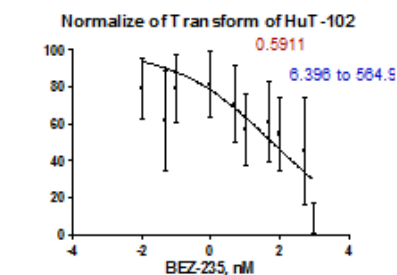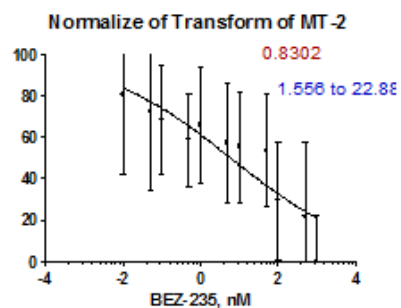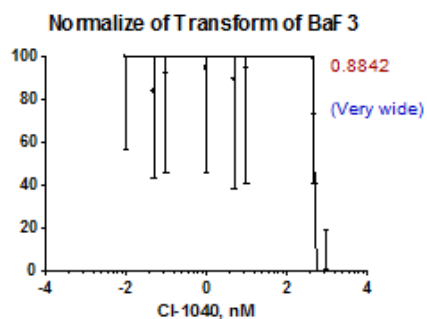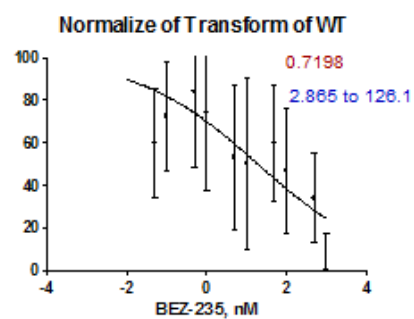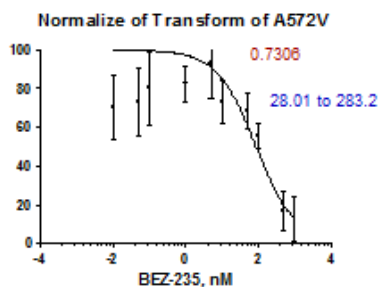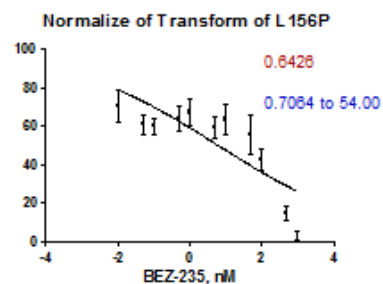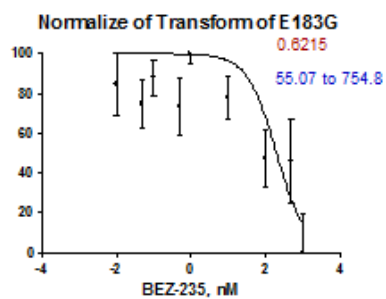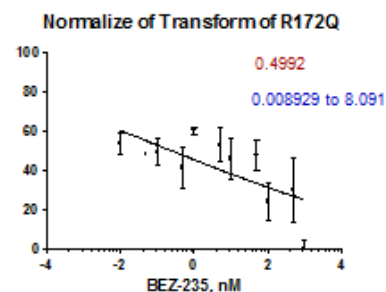

Supplement: supp_blood-2010-12-319467_Document1.pdf [file supp_blood-2010-12-319467_Document1.pdf]
